# Supplementary material for: COMET: adaptive context-based modeling for ultrafast HIV-1 subtype identification
Source: PubMed Central journal article supplement — Nucleic Acids Res. 2014 Aug 12;42(18):e144. doi: 10.1093/nar/gku739 (PMC4191385; doi:10.1093/nar/gku739), 2014-08-12
Supplement: supp_gku739_nar-00930-met-g-2014-File011.pdf [file supp_gku739_nar-00930-met-g-2014-File011.pdf]

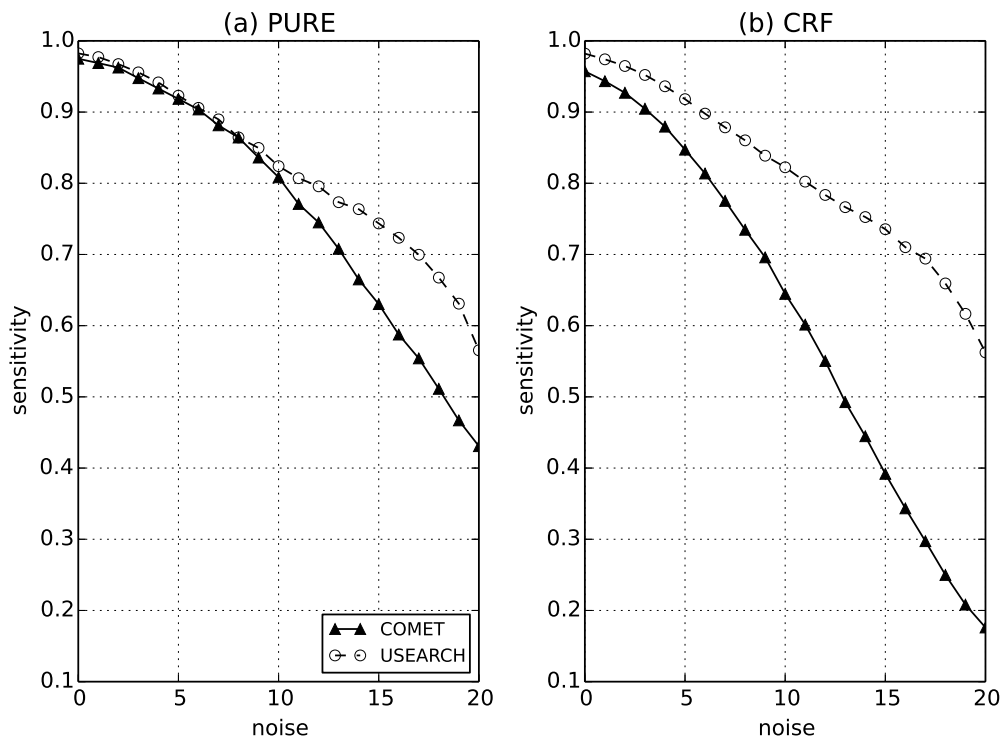

Supplementary Figure S3: Sensitivity of COMET and USEARCH to correctly type the synthetic variation dataset comprising 1,090,698 with varying levels of noise throughout the genome.
