# Supplementary material for: COMET: adaptive context-based modeling for ultrafast HIV-1 subtype identification
Source: PubMed Central journal article supplement — Nucleic Acids Res. 2014 Aug 12;42(18):e144. doi: 10.1093/nar/gku739 (PMC4191385; doi:10.1093/nar/gku739), 2014-08-12
Supplement: supp_gku739_nar-00930-met-g-2014-File012.pdf [file supp_gku739_nar-00930-met-g-2014-File012.pdf]

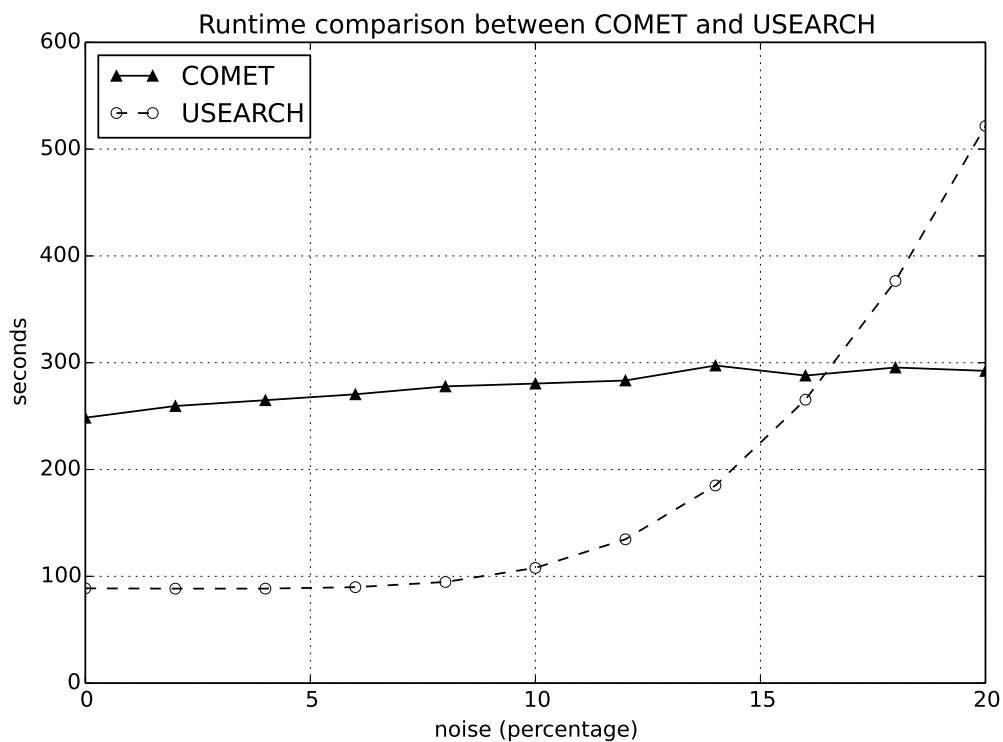

Supplementary Figure S4: Runtime comparison between COMET and USEARCH. For this comparison, synthetic variation datasets were constructed as described in the main text, except that each dataset was created using a fixed noise level. The figure reports, for each noise level, mean run time over ten runs on datasets containing 1,090,698 queries.
