# Supplementary figures and images for: COMET: adaptive context-based modeling for ultrafast HIV-1 subtype identification
Source: PubMed Central journal article supplement — Nucleic Acids Res. 2014 Aug 12;42(18):e144. doi: 10.1093/nar/gku739 (PMC4191385; doi:10.1093/nar/gku739), 2014-08-12

# kmax=7

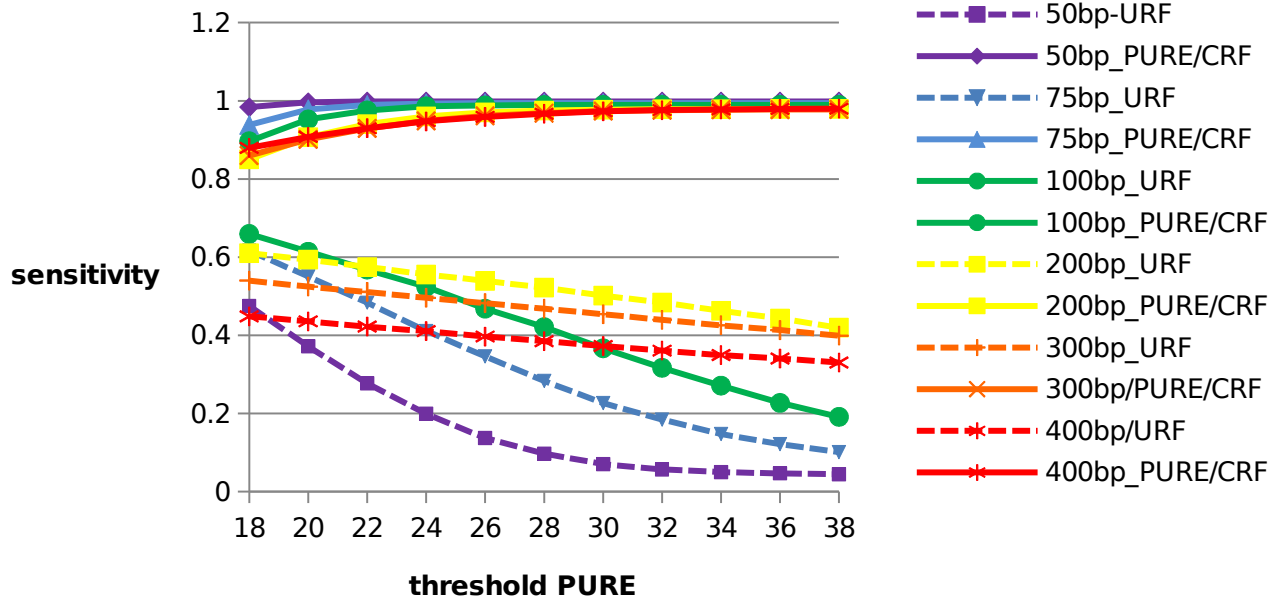

# kmax=7

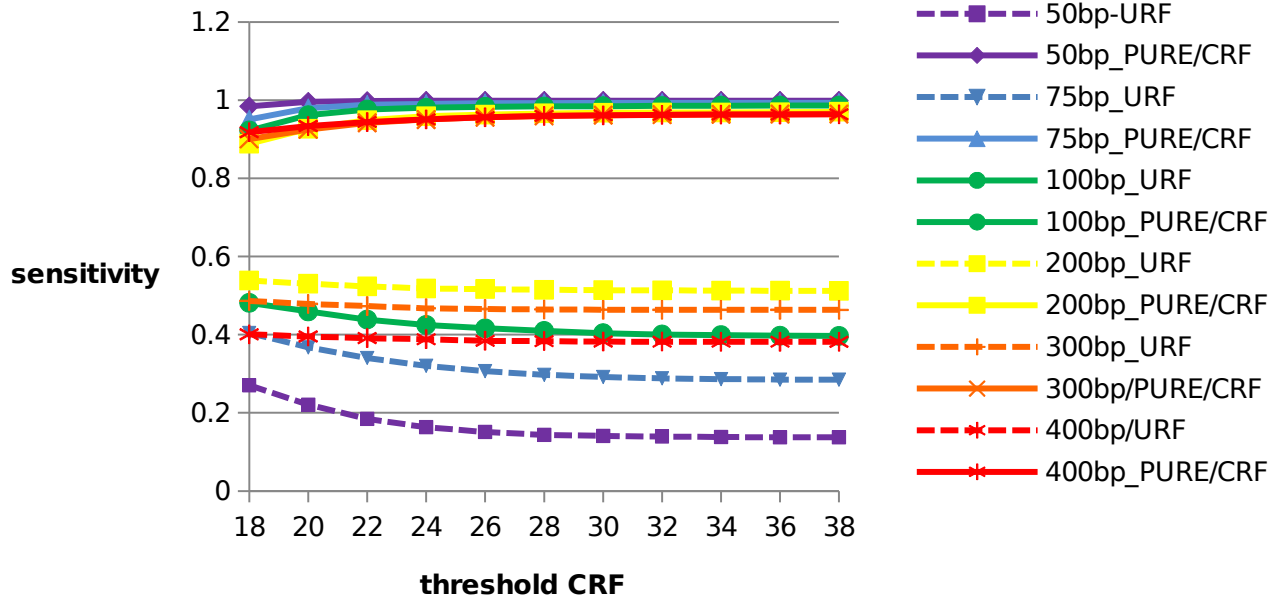

# kmax=8

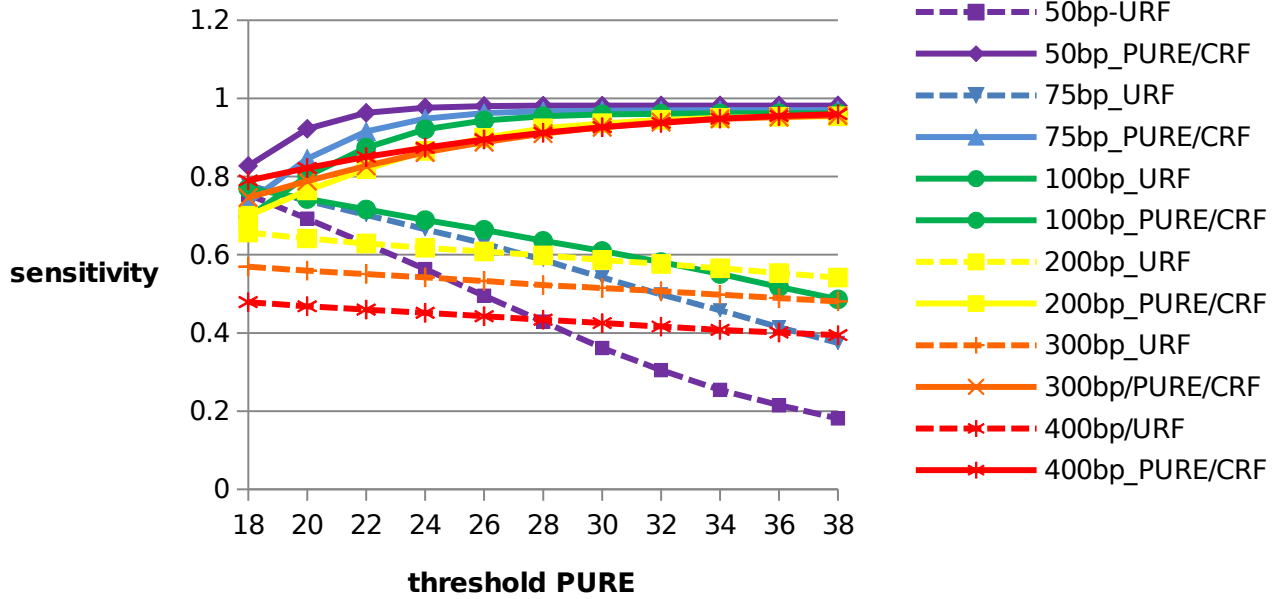

# kmax=8

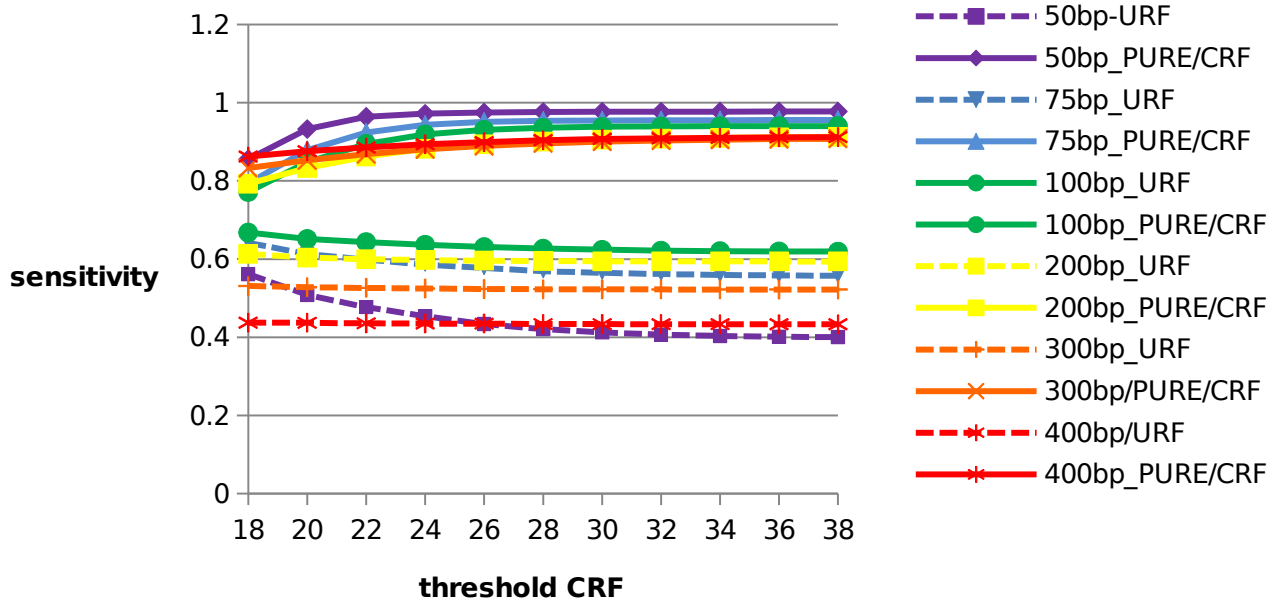

Supplement: supp_gku739_nar-00930-met-g-2014-File009.pdf [file supp_gku739_nar-00930-met-g-2014-File009.pdf]
